# Supplementary material
Source: ML conference proceedings conference paper supplement (https://proceedings.mlr.press/v70/mollaysa17a.html)
Supplement: Supplementary file [file mollaysa17a-supp.pdf]

## 6. Appendix

### 6.1. Modified Backpropagation

For notion simplicity, we consider stochastic gradient descent. The objective function we want to minimize is as following:

$$E = L(\mathbf{y}, \phi(\mathbf{x})) + \lambda_1 \sum_{ij} \left\| \frac{\partial \phi(\mathbf{x})}{\partial x_i} - \frac{\partial \phi(\mathbf{x})}{\partial x_j} \right\|^2 S_{ij} \quad (12)$$

Notice that the objective function includes derivative of the learned function with respect to the input features, if we use neural network to learn the model, the conventional backpropagation algorithm can't be applied directly. Therefore, we developed a modified version of the backpropagation algorithm to find the gradient of the objective.

We keep the notation consistent with the notation used in the book of (Bishop, 1995).  $n$  is the total layers (including input and out put layer) number of the network,  $a^k$  is the pre-activation units in layer  $k$ ,  $k_1$  is the number of hidden units in hidden layer  $k$ ,  $m$  is the number of output units, and  $h(x)$  stands for the non-linear activation function.

$$\begin{aligned} \mathbf{z}^0 &= \mathbf{x} \\ \mathbf{a}^k &= \mathbf{w}^k \mathbf{z}^{k-1} + \mathbf{b}^k \\ \mathbf{z}^k &= h(\mathbf{a}^k) \\ \phi(\mathbf{x}) &= \mathbf{z}^n \end{aligned} \quad (13)$$

To find the gradient of (12), we define  $\delta^k$  as the Jacobian of the learned function with respect to pre-activations at the layer  $k$ :

$$\delta^k = \begin{bmatrix} \frac{\partial \phi_1}{\partial a_1^k} & \frac{\partial \phi_2}{\partial a_1^k} & \dots & \frac{\partial \phi_m}{\partial a_1^k} \\ \frac{\partial \phi_1}{\partial a_2^k} & \frac{\partial \phi_2}{\partial a_2^k} & \dots & \frac{\partial \phi_m}{\partial a_2^k} \\ \vdots & \vdots & \vdots & \vdots \\ \frac{\partial \phi_1}{\partial a_{k_1}^k} & \frac{\partial \phi_2}{\partial a_{k_1}^k} & \dots & \frac{\partial \phi_m}{\partial a_{k_1}^k} \end{bmatrix} \quad (14)$$

$\delta^k$  for all  $k$  can be achieved by the following backpropagation equation.

$$\delta^k = ((\mathbf{W}^{k+1})^T \delta^{k+1}) \odot h'(a^k) \quad \forall k = 1, 2, \dots, n-1 \quad (15)$$

Where  $\odot$  stands for the element wise multiplication of a column vector to every column of the matrix.

$$\delta^n = \begin{bmatrix} h'(a_1^n) & 0 & \dots & 0 \\ 0 & h'(a_2^n) & \dots & 0 \\ \dots & \dots & \dots & \dots \\ 0 & 0 & \dots & h'(a_m^n) \end{bmatrix} \quad (16)$$

Defining the term  $\delta$  in such a away, we can rewrite the regularizer term in equation (12) as following:

$$\sum_{ij} \|(\mathbf{W}^1(:, i)) - \mathbf{W}^1(:, j)\|^T \delta^1\|^2 S_{ij} \quad (17)$$

If the network only has one hidden layer, we can derive derivative of the regularizer with respect to weights using  $\delta$  and (15). When hidden layer's number is more than one, we need to introduce two more term, one to the backward path and one to the forward path: Define  $\mathbf{G}^k$  as the jacobian of pre-activation unit at layer  $k$  with respect to pre-activation at first hidden layer, note layer  $k = 1$  corresponding to first hidden layer.

$$G_{mg}^k = \frac{\partial a_m^k}{\partial a_g^1} \quad \forall k = 1, 2, 3, \dots, n \quad (18)$$

We know that:

$$G_{mg}^1 = \frac{\partial a_m^1}{\partial a_g^1} = \begin{cases} 1 & \text{if } m=g \\ 0 & \text{others} \end{cases} \quad (19)$$

And  $\mathbf{G}^k$  for all  $k$  can be achieved during forward path by the following forward propagation equation and  $\mathbf{G}^1$

$$G_{mg}^k = \sum_l W_{ml}^k G_{lg}^{k-1} h'(a_l^{k-1}) \quad \forall k = 2, 3, \dots, n \quad (20)$$

Define  $\mathbf{B}^k$  which gives the derivative of the  $\delta^k$  with respect to the pre-activation units in the first hidden layers:

$$B_{ljg}^k = \frac{\partial \delta_{lj}^k}{\partial a_g^1} \quad \forall k = 1, 2, \dots, n \quad (21)$$

We know that:

$$B_{ljg}^n = \frac{\partial \delta_{lj}^n}{\partial a_g^1} = h''(a_l^n) \mathbf{1}_{lj} G_{lg}^n \quad (22)$$

$\mathbf{B}^k$  for all  $k$  can be obtained by the following propagating equation during backward path using  $\mathbf{B}^n$  as following:

$$B_{ljg}^k = h''(a_l^k) G_{lg}^k \sum_p \delta_{pj}^{k+1} W_{pl}^{k+1} + h'(a_l^k) \sum_p W_{pl}^{k+1} B_{pjg}^{k+1} \quad (23)$$

$$\forall k = 1, 2, \dots, n-1$$

Finally, the gradient of the regularizer, i.e. second term of the equation (12), can be calculated as following:

For  $k = 1$ , i.e. first hidden layer:

$$\begin{aligned} \frac{\partial R}{\partial W_{lm}^1} &= 4\lambda_1 \sum_s S_{ms} \sum_j (\mathbf{W}^1(:, m) - \mathbf{W}^1(:, s))^T \delta^1(:, j) \delta^1(l, j) \\ &+ 2\lambda_1 \sum_{ks} S_{ks} \sum_j (\mathbf{W}^1(:, k) - \mathbf{W}^1(:, s))^T \delta^1(:, j) \sum_g (W^1(g, k) - W^1(g, s)) B_{ijg}^1 z_m^0 \end{aligned} \quad (24)$$

For  $k = 2, \dots, n$ :

$$\begin{aligned} \frac{\partial R}{\partial W_{lm}^k} &= 2\lambda_1 \sum_{ks} S_{ks} \sum_j (\mathbf{W}^1(:, k) - \mathbf{W}^1(:, s))^T \delta^1(:, j) \\ &\sum_g (W^1(g, k) - W^1(g, s)) (z_m^{k-1} B_{ijg}^k + \delta_{lj}^k h'(a_m^{k-1}) G_{mg}^{k-1}) \end{aligned} \quad (25)$$

Gradient with respect to bias term, for all  $k = 1, \dots, n$ :

$$\frac{\partial R}{\partial b_{lm}^k} = 2\lambda_1 \sum_{ks} S_{ks} \sum_j (\mathbf{W}^1(:, k) - \mathbf{W}^1(:, s))^T \boldsymbol{\delta}^1(:, j) \sum_g (W^1(g, k) - W^1(g, s)) B_{l j g}^k \quad (26)$$

The gradient of the first part of the objective which is some loss function we chose, is same as in the standard Back-propagation algorithm, here we just need to rewrite it in terms of the newly defined  $\boldsymbol{\delta}$ . For example, if we use sigmoid on all layers as activation function and cross entropy loss, we have the following:

$$E = - \sum_{i=1}^m (y_i \log \phi(x)_i + (1 - y_i) \log(1 - \phi(x)_i)) \quad (27)$$

$$\frac{\partial E}{\partial \mathbf{W}^k} = \boldsymbol{\delta}^k \frac{\phi - \mathbf{y}}{\phi(1 - \phi)} (\mathbf{z}^{k-1})^T \quad (28)$$

$$\frac{\partial E}{\partial \mathbf{b}^k} = \boldsymbol{\delta}^k \frac{\phi - \mathbf{y}}{\phi(1 - \phi)} \quad (29)$$

Now we can find the gradient of the loss with respect to weights in all layers. Compared to the conventional back propagation algorithm, except we have  $\boldsymbol{\delta}$  term which is defined differently than the conventional backprop algorithm, we have one more extra term  $\mathbf{B}^k$  to add to the backward path and one more term  $\mathbf{G}^h$  to the forward path.
